# Supplementary material for: Applicability of Diagnostic Criteria and High Prevalence of Familial Dysbetalipoproteinemia in Russia: A Pilot Study
Source: MDPI journal article supplement (doi:10.3390/ijms241713159), 2023-08-24
Supplement: s1 [file s1]

**Supplementary Table S1.** The clinical interpretation of the detected *APOE* variants, associated with the autosomal dominant FD.

| Number of subjects, total (ESSE-Ivanovo) | Variant                                   | Genomic coordinates (GRCh37) | Reference allele                     | Alternative allele | Variant class | Consequence | HGVSc (NM_000041.4) | HGVSp (NP_000032.1) | AF, gnomAD <sup>1</sup> , % | ACMG/AMP2015                                                | Clinical Significance             |
|------------------------------------------|-------------------------------------------|------------------------------|--------------------------------------|--------------------|---------------|-------------|---------------------|---------------------|-----------------------------|-------------------------------------------------------------|-----------------------------------|
| 5 (3)                                    | rs121918393<br><i>APOE2</i><br>Heidelberg | chr19:45412013               | C                                    | T                  | SNV           | missense    | c.460C>T            | p.Arg154Cys         | 0.008979                    | PM1 [1], PM2, PP1_Moderate [1], PP3 (REVEL=0.898), PP4, PP5 | likely pathogenic                 |
| 4 (1)                                    | rs267606664                               | chr19:45411987               | G                                    | A                  | SNV           | missense    | c.434G>A            | p.Gly145Asp         | 0.01532                     | BS1, PP4, PP1, REVEL = 0.581                                | variant of uncertain significance |
| 6 (3)                                    | rs199768005                               | chr19:45412314               | T                                    | A                  | SNV           | missense    | c.761T>A            | p.Val254Glu         | 0.04515                     | BS1, PP4 <sup>2</sup> , REVEL score=0.260                   | variant of uncertain significance |
| 1 (0)                                    | rs267606661                               | chr19:45412358               | C                                    | G                  | SNV           | missense_   | c.805C>G            | p.Arg269Gly         | 0.03605                     | BS1, PP4 [2], REVEL=0.581                                   | variant of uncertain significance |
| 1 (0)                                    | rs1969839083                              | chr19:45411157-45411160      | CTGT                                 | -                  | deletion      | frameshift  | c.184_187del        | p.Glu63ArgfsTer15   | -                           | PVS1, PM2, PP4 <sup>3</sup>                                 | pathogenic                        |
| 1 (1)                                    | -                                         | chr19:45411985-45412012      | CGGCCAGAG<br>CACCGAGGA<br>GCTGCGGGTG | -                  | deletion      | frameshift  | c.432_459del        | p.Gly145AlafsTer97  | -                           | PVS1, PM2                                                   | likely pathogenic                 |

<sup>1</sup> gnomAD version 2.1.1, the allele frequencies were obtained from exome and genome data, accessed on 16 May 2023.

<sup>2</sup> Three subjects in present study had a clinical data (one male, 48 years old, triglyceride level 3.27 mmol/L, glucose 6.72 mmol/L, body mass index 28.82 kg/m<sup>2</sup>, carotid atherosclerosis (number of plaques 3 and maximum stenosis 54.0%), femoral atherosclerosis (number of plaques 3 and maximum stenosis 27.0%), coronary heart disease – no, diabetes mellitus – not known; woman, 51 years

old, triglyceride level 1.70 mmol/L, body mass index 39.85 kg/m<sup>2</sup>, carotid and femoral atherosclerosis, coronary heart disease – no; and woman, 53 years old, triglyceride level 1.43 mmol/L, body mass index 28.88 kg/m<sup>2</sup>, carotid and femoral atherosclerosis, coronary heart disease – no).

<sup>3</sup>—data of the present study (woman, 57 years old, triglyceride level 4.75 mmol/L, Achilles tendon xanthomas).

AF—allele frequency; ACMG/AMP2015—the American College of Medical Genetics and Genomics/Association for Molecular Pathology; BS1—strong evidence of benign impact; gnomAD—Genome Aggregation Database; HGVS<sub>c</sub>—Human Genome Variation Society coding sequence name; HGVS<sub>p</sub>—Human Genome Variation Society protein sequence name; PM (1,2)—moderate evidence of pathogenicity; PP (1,3,4,5)—supporting evidence of pathogenicity; PVS1—very strong evidence of pathogenicity; SNV—single nucleotide variant.

## References

1. Feussner, G.; Albanese, M.; Mann, W.A.; Valencia, A.; Schuster, H. Apolipoprotein E2 (Arg-136→ Cys), a variant of apolipoprotein E associated with late-onset dominance of type III hyperlipoproteinaemia. *Eur. J. Clin. Invest.* **1996**, *26*, 13–23. doi:10.1046/j.1365-2362.1996.83232.x.
2. van den Maagdenberg, A.M.; Weng, W.; de Bruijn, I.H.; de Knijff, P.; Funke, H.; Smelt, A.H.; Gevers Leuven, J.A.; van't Hooft, F.M.; Assmann, G.; Hofker, M.H.; et al. Characterization of five new mutants in the carboxyl-terminal domain of human apolipoprotein E: no cosegregation with severe hyperlipidemia. *Am. J. Hum. Genet.* **1993**, *52*, 937-946.
