# Supplementary material for: Applicability of Diagnostic Criteria and High Prevalence of Familial Dysbetalipoproteinemia in Russia: A Pilot Study
Source: MDPI journal article supplement (doi:10.3390/ijms241713159), 2023-08-24
Supplement: s1 [file s1]

| Characteristics                              | ESSE-Ivanovo sample<br>( <i>n</i> = 1652) <sup>1</sup> |
|----------------------------------------------|--------------------------------------------------------|
| Men, n (%)                                   | 614 (37.2%)                                            |
| Age, years                                   | 49 [39; 57]                                            |
| Body mass index, kg/m <sup>2</sup>           | 28.0 [24.6; 31.8]                                      |
| Presence of diabetes, n (%)                  | 82 (5.0%)                                              |
| Presence of arterial hypertension, n (%)     | 1,228 (74.3%)                                          |
| Coronary heart disease, n (%)                | 73 (4.4%)                                              |
| Statins, n (%)                               | 93 (5.7%)<br><i>n</i> = 1644 <sup>2</sup>              |
| Omega-3 polyunsaturated fatty acids, n (%)   | 1 (0.1%)<br><i>n</i> = 1644 <sup>2</sup>               |
| Total cholesterol, mmol/L                    | 5.46 [4.72; 6.28]                                      |
| Triglycerides, mmol/L                        | 1.23 [0.87; 1.82]                                      |
| Low density lipoprotein cholesterol, mmol/L  | 3.20 [2.41; 4.01]                                      |
| High density lipoprotein cholesterol, mmol/L | 1.38 [1.18; 1.62]                                      |

**Supplementary Table S2.** Characteristics of the ESSE-Ivanovo sample.

<sup>1</sup>Data are presented as percentages or median [Q1; Q3]. <sup>2</sup> Eight subjects had no data on lipid-lowering therapy.
